# Supplementary material for: Monitoring for 5-aminosalicylate toxicity: prognostic model development and validation
Source: bioRxiv or medRxiv preprint supplement (doi:10.1101/2023.12.15.23299944), 2023-12-18

## Contents

|                                                                                                                                                                                                                 |    |
|-----------------------------------------------------------------------------------------------------------------------------------------------------------------------------------------------------------------|----|
| Supplementary Table 1: Individual patient’s characteristics at the midpoint of each decile. ....                                                                                                                | 2  |
| Supplementary Table 2: The estimated probability that a delayed abnormal blood test would have caused a more serious condition with 5-ASA. ....                                                                 | 3  |
| Supplementary Table 3: The estimated costs and Quality Adjusted Life Years (QALY) losses associated with each condition derived from the literature <sup>1-11</sup> . Please see health economics methods. .... | 4  |
| Supplementary Table 4: Disaggregated results in the base case.....                                                                                                                                              | 5  |
| Supplementary Table 5: Aggregated Results in the base case compared with current 3-month monitoring.....                                                                                                        | 5  |
| Figure S1: Study population selection criteria for model development.....                                                                                                                                       | 6  |
| Figure S2: Model validation cohort: Study population selection criteria .....                                                                                                                                   | 7  |
| Figure S3: Nelson–Aalen cumulative hazard estimates for 5-ASA discontinuation associated with individual blood-test abnormalities*.....                                                                         | 8  |
| Figure S4: Distribution of predicted risk in the model development cohort at 5 years .....                                                                                                                      | 9  |
| Figure S5: Calibration plot of a prognostic model for 5-ASA discontinuation with abnormal monitoring blood-test results at 5-years in the development cohort <sup>1</sup> .....                                 | 10 |
| Figure S6: Calibration plot of a prognostic model for 5-ASA discontinuation with abnormal monitoring blood-test results at 5-years in the validation cohort <sup>1</sup> .....                                  | 11 |
| Figure S7: Distribution of predicted risk in the model validation cohort at 5 years .....                                                                                                                       | 12 |
| Figure S8: Calibration of a prognostic model for 5-ASA discontinuation with abnormal monitoring blood-test results at 1 year in the validation cohort <sup>1</sup> .....                                        | 13 |
| Figure S9: Calibration of a prognostic model for 5-ASA discontinuation with abnormal monitoring blood-test results at 2 years in the validation cohort <sup>1</sup> .....                                       | 14 |
| Figure S10: Calibration of a prognostic model for 5-ASA discontinuation with abnormal monitoring blood-test results at 3 years in the validation cohort <sup>1</sup> .....                                      | 15 |
| Figure S11: Calibration of a prognostic model for 5-ASA discontinuation with abnormal monitoring blood-test results at 4 years in the validation cohort <sup>1</sup> .....                                      | 16 |
| Figure S12: Incremental net monetary benefit results when the risks of serious conditions estimated by clinicians were tripled.....                                                                             | 17 |

Supplementary Table 1: Individual patient's characteristics at the midpoint of each decile.

| Decile | Age (yr.) | Sex | BMI (kg/m <sup>2</sup> ) | Alcohol     | Disease | DM  | CKD -3 | IS drug  | Statins | Carb/Val | Paracetamol | BTA | Cumulative probability of outcome % |
|--------|-----------|-----|--------------------------|-------------|---------|-----|--------|----------|---------|----------|-------------|-----|-------------------------------------|
| 1      | 30-35     | M   | 24.6                     | Low         | IBD     | No  | No     | No       | No      | No       | No          | No  | 3.13                                |
| 2      | 35-40     | M   | 23.8                     | Low         | IBD     | No  | No     | No       | No      | No       | No          | No  | 3.18                                |
| 3      | 30-35     | F   | 28.0                     | Low         | IBD     | No  | No     | No       | No      | No       | No          | No  | 3.23                                |
| 4      | 50-55     | F   | 19.1                     | Non-drinker | IBD     | No  | No     | No       | No      | No       | No          | No  | 3.29                                |
| 5      | 65-70     | F   | 28.5                     | Low         | IBD     | No  | No     | No       | No      | No       | Yes         | No  | 3.39                                |
| 6      | 65-70     | M   | 26.1                     | Low         | IBD     | No  | No     | No       | Yes     | No       | Yes         | No  | 3.88                                |
| 7      | 50-55     | M   | 27.9                     | Non-drinker | IBD     | No  | No     | No       | No      | No       | No          | No  | 4.55                                |
| 8      | 40-45     | M   | 22.9                     | Non-drinker | IBD     | Yes | No     | No       | No      | No       | Yes         | No  | 5.48                                |
| 9      | 65-70     | M   | 31.0                     | Low         | IBD     | No  | Yes    | Aza/6-MP | No      | No       | Yes         | No  | 6.08                                |
| 10     | 60-65     | M   | 30.7                     | Low         | IBD     | Yes | Yes    | No       | Yes     | No       | No          | No  | 8.62                                |

Aza/6-MP: Azathioprine/6-Mercaptopurine; BMI: Body Mass Index; BTA: Blood Test abnormalities within 6 months of primary care 5-ASA prescription; CKD-3: Chronic Kidney Disease stage 3; Carb/Val: carbamazepine/valproate; DM: diabetes mellitus; F: female; IS immunosuppressive; M: male, ± 5-year age band. Exact age not shown for anonymity.

Supplementary Table 2: The estimated probability that a delayed abnormal blood test would have caused a more serious condition with 5-ASA.

| Adverse Event                               | 6-monthly monitoring | Annual monitoring | Two-yearly monitoring |
|---------------------------------------------|----------------------|-------------------|-----------------------|
| Acute kidney injury*                        |                      |                   |                       |
| Acute liver failure*                        |                      |                   |                       |
| Anaemia*                                    |                      |                   |                       |
| Chronic kidney disease                      | 0.001                | 0.001             | 0.008                 |
| Cirrhosis*                                  |                      |                   |                       |
| Drug-induced liver injury                   | 0.001                | 0.001             | 0.001                 |
| Early fibrosis*                             |                      |                   |                       |
| Low neutrophil count plus sepsis            | 0.0001               | 0.0002            | 0.0004                |
| Neutropenic sepsis                          | 0.0001               | 0.0002            | 0.0004                |
| Thrombocytopenia requiring hospitalisation* |                      |                   |                       |
| Thrombocytopenia with superficial bleeding* |                      |                   |                       |

\*The clinical experts did not think that 5-ASA causes these outcomes.

Supplementary Table 3: The estimated costs and Quality Adjusted Life Years (QALY) losses associated with each condition derived from the literature<sup>1-11</sup>. Please see health economics methods.

| Condition                                  | Costs (£) | QALY loss          |
|--------------------------------------------|-----------|--------------------|
| Acute Kidney Injury                        | 2022      | 0.014              |
| Acute Liver Failure                        | 3352      | 0.651              |
| Anaemia                                    | 465       | 0.001              |
| Chronic Kidney Disease                     | 26,083    | 1.308              |
| Cirrhosis                                  | 21,700    | 3.042              |
| Drug-Induced Liver Injury                  | 3352      | 0.651              |
| Early Fibrosis                             | 0         | 0.075 <sup>†</sup> |
| Low neutrophil count plus sepsis           | 2313      | 2.490              |
| Neutropenic Sepsis                         | 9456      | 2.490              |
| Thrombocytopenia requiring hospitalisation | 1018      | 0.016              |
| Thrombocytopenia with superficial bleeding | 133       | 0.001              |

<sup>†</sup>per 6 months unidentified

Supplementary Table 4: Disaggregated results in the base case

| Decile | Monitoring Appointments |         |        |          | Monitoring Costs Saved compared with current 3-month monitoring (£) |        |          | Abnormal blood results identified late compared with current 3-month monitoring |        |          | Costs associated with late identification of abnormal blood results (£) |        |          | QALY losses associated with late identification of abnormal blood results |        |          |
|--------|-------------------------|---------|--------|----------|---------------------------------------------------------------------|--------|----------|---------------------------------------------------------------------------------|--------|----------|-------------------------------------------------------------------------|--------|----------|---------------------------------------------------------------------------|--------|----------|
|        | 3-months                | 6-month | Annual | Biennial | 6-month                                                             | Annual | Biennial | 6-month                                                                         | Annual | Biennial | 6-month                                                                 | Annual | Biennial | 6-month                                                                   | Annual | Biennial |
| 1      | 19.67                   | 9.84    | 4.93   | 1.99     | 185.99                                                              | 278.98 | 331.62   | 0.016                                                                           | 0.024  | 0.029    | 0.46                                                                    | 0.73   | 5.94     | 0.000                                                                     | 0.001  | 0.004    |
| 2      | 19.67                   | 9.84    | 4.93   | 1.99     | 185.98                                                              | 278.96 | 331.59   | 0.016                                                                           | 0.025  | 0.029    | 0.46                                                                    | 0.73   | 5.96     | 0.000                                                                     | 0.001  | 0.004    |
| 3      | 19.67                   | 9.84    | 4.93   | 1.99     | 185.95                                                              | 278.92 | 331.54   | 0.016                                                                           | 0.025  | 0.029    | 0.47                                                                    | 0.74   | 6.01     | 0.000                                                                     | 0.001  | 0.004    |
| 4      | 19.66                   | 9.84    | 4.93   | 1.99     | 185.88                                                              | 278.81 | 331.42   | 0.017                                                                           | 0.025  | 0.030    | 0.48                                                                    | 0.76   | 6.14     | 0.000                                                                     | 0.001  | 0.004    |
| 5      | 19.65                   | 9.83    | 4.93   | 1.99     | 185.80                                                              | 278.69 | 331.28   | 0.017                                                                           | 0.026  | 0.031    | 0.49                                                                    | 0.77   | 6.29     | 0.000                                                                     | 0.001  | 0.004    |
| 6      | 19.60                   | 9.81    | 4.91   | 1.99     | 185.28                                                              | 277.91 | 330.34   | 0.020                                                                           | 0.030  | 0.036    | 0.56                                                                    | 0.89   | 7.26     | 0.000                                                                     | 0.001  | 0.004    |
| 7      | 19.52                   | 9.77    | 4.90   | 1.99     | 184.48                                                              | 276.70 | 328.90   | 0.024                                                                           | 0.036  | 0.043    | 0.68                                                                    | 1.08   | 8.74     | 0.001                                                                     | 0.001  | 0.005    |
| 8      | 19.45                   | 9.74    | 4.88   | 1.98     | 183.82                                                              | 275.71 | 327.71   | 0.027                                                                           | 0.043  | 0.049    | 0.77                                                                    | 1.23   | 9.97     | 0.001                                                                     | 0.001  | 0.006    |
| 9      | 19.36                   | 9.70    | 4.86   | 1.98     | 183.01                                                              | 274.50 | 326.26   | 0.031                                                                           | 0.047  | 0.056    | 0.89                                                                    | 1.41   | 11.46    | 0.001                                                                     | 0.001  | 0.007    |
| 10     | 19.11                   | 9.58    | 4.81   | 1.97     | 180.54                                                              | 270.79 | 321.82   | 0.043                                                                           | 0.066  | 0.080    | 1.24                                                                    | 1.97   | 16.00    | 0.001                                                                     | 0.002  | 0.010    |

Supplementary Table 5: Aggregated Results in the base case compared with current 3-month monitoring

| Decile | Net Cost Savings (£) |        |          | Net QALY losses |        |          |
|--------|----------------------|--------|----------|-----------------|--------|----------|
|        | 6-month              | Annual | Biennial | 6-month         | Annual | Biennial |
| 1      | 185.53               | 278.25 | 325.68   | 0.0000          | 0.0001 | 0.0004   |
| 2      | 185.51               | 278.22 | 325.63   | 0.0000          | 0.0001 | 0.0004   |
| 3      | 185.48               | 278.18 | 325.53   | 0.0000          | 0.0001 | 0.0004   |
| 4      | 185.40               | 278.05 | 325.27   | 0.0000          | 0.0001 | 0.0004   |
| 5      | 185.31               | 277.92 | 324.99   | 0.0000          | 0.0001 | 0.0004   |
| 6      | 184.71               | 277.02 | 323.08   | 0.0000          | 0.0001 | 0.0004   |
| 7      | 183.80               | 275.63 | 320.16   | 0.0001          | 0.0001 | 0.0005   |
| 8      | 183.04               | 274.49 | 317.75   | 0.0001          | 0.0001 | 0.0006   |
| 9      | 182.12               | 273.09 | 314.80   | 0.0001          | 0.0001 | 0.0007   |
| 10     | 179.29               | 268.82 | 305.83   | 0.0001          | 0.0002 | 0.0010   |

Figure S1: Study population selection criteria for model development

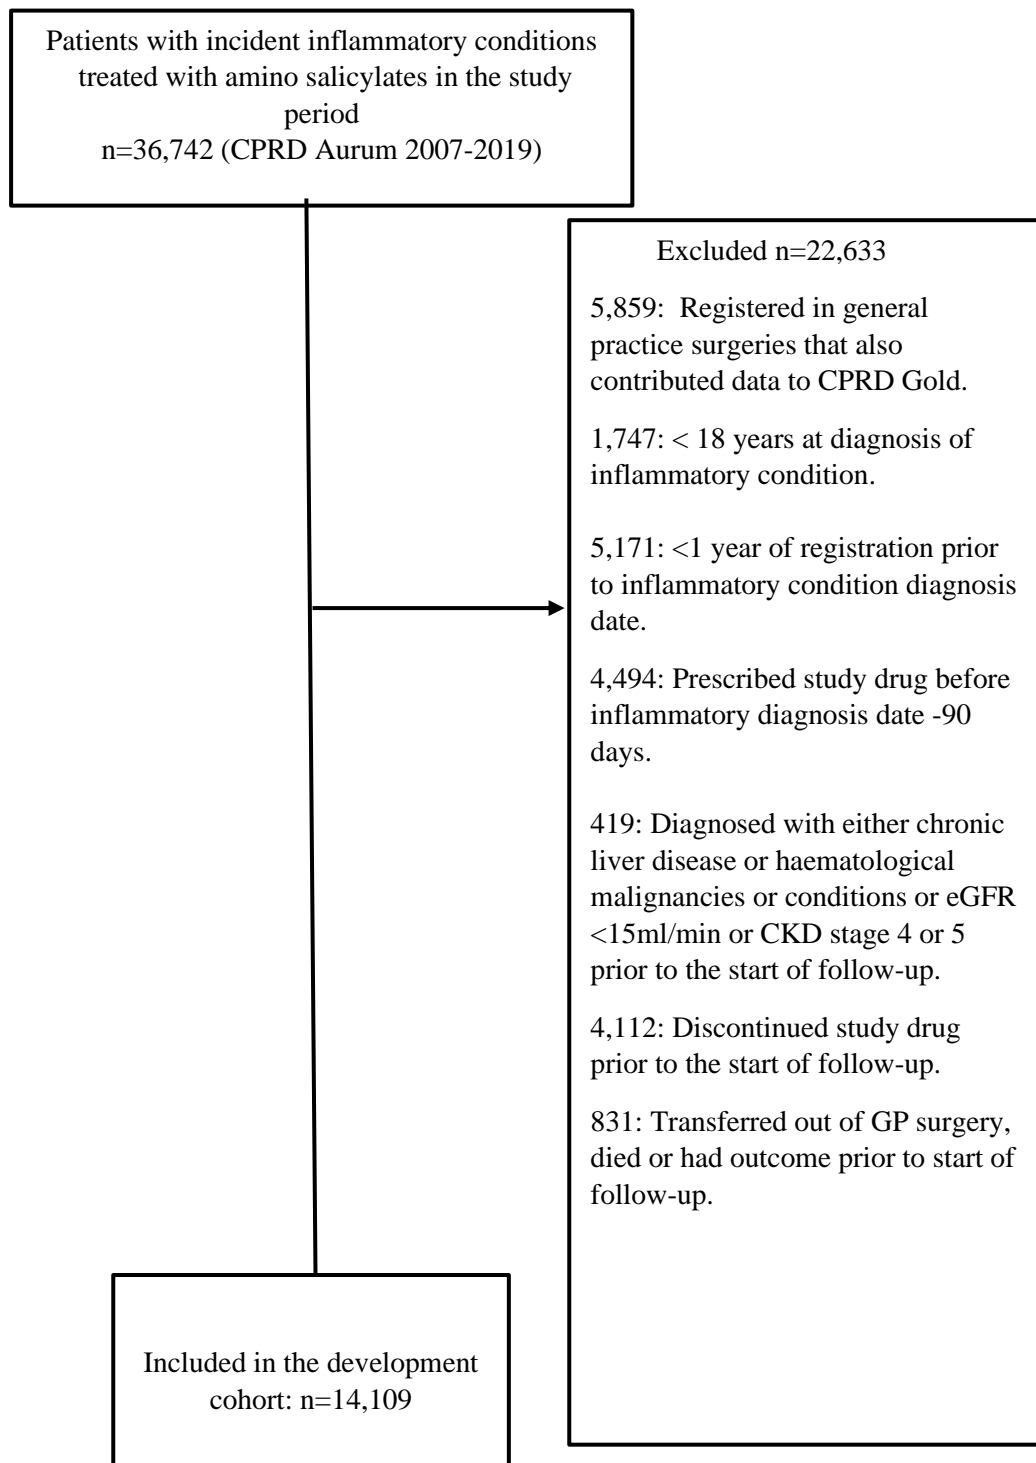

Aminosalicylates were balsalazide, mesalazine and olsalazine, CKD: chronic kidney disease, GP: General practice, CPRD: Clinical Practice Research Datalink.

Figure S2: Model validation cohort: Study population selection criteria

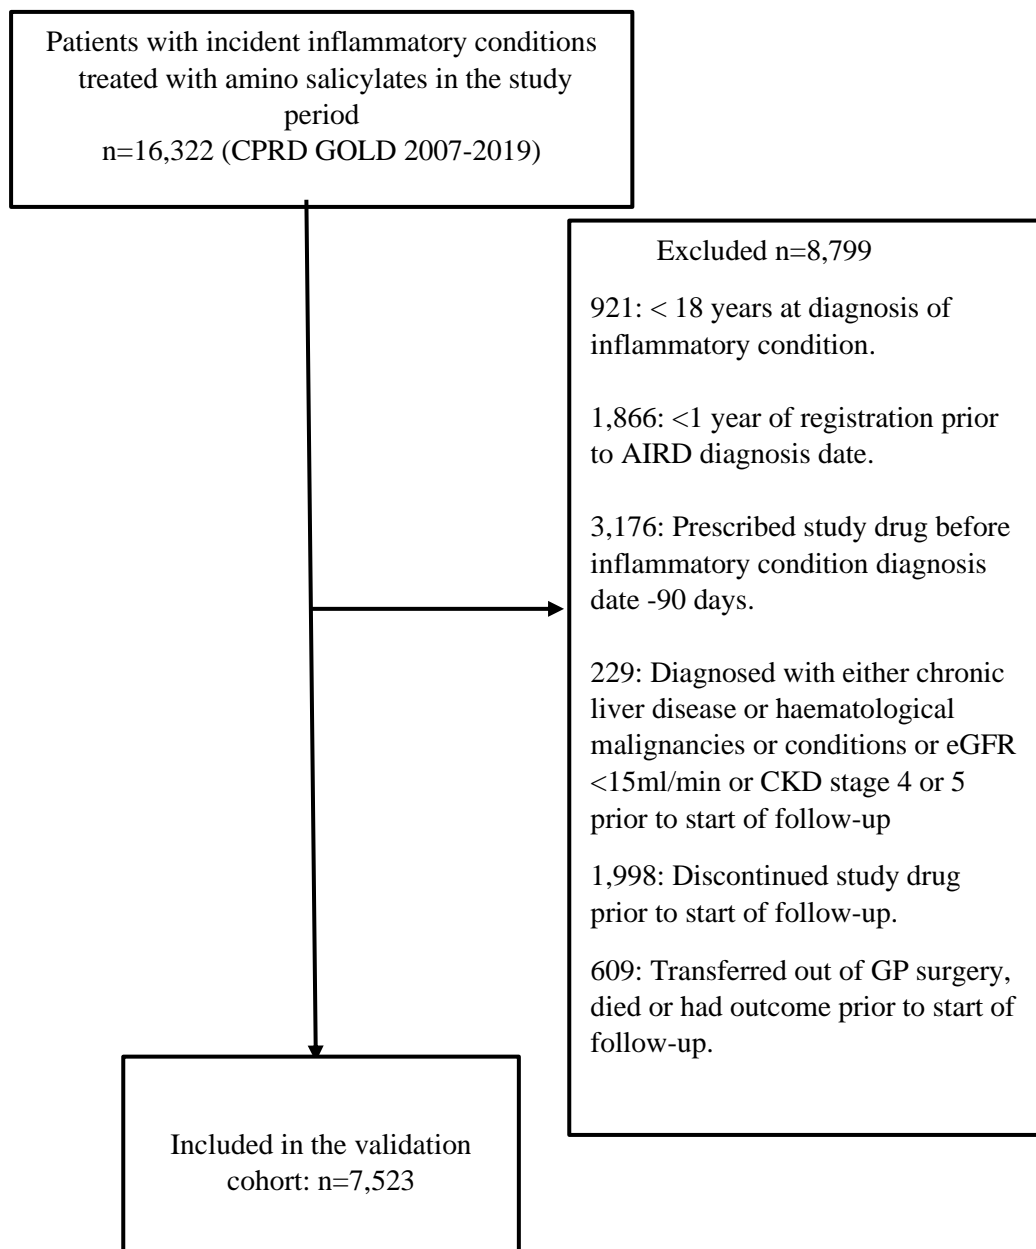

Aminosalicylates were balsalazide, mesalazine and Olsalazine, CKD: chronic kidney disease, GP: General practice, CPRD: Clinical Practice Research Datalink.

Figure S3: Nelson–Aalen cumulative hazard estimates for 5-ASA discontinuation associated with individual blood-test abnormalities\*.

A.

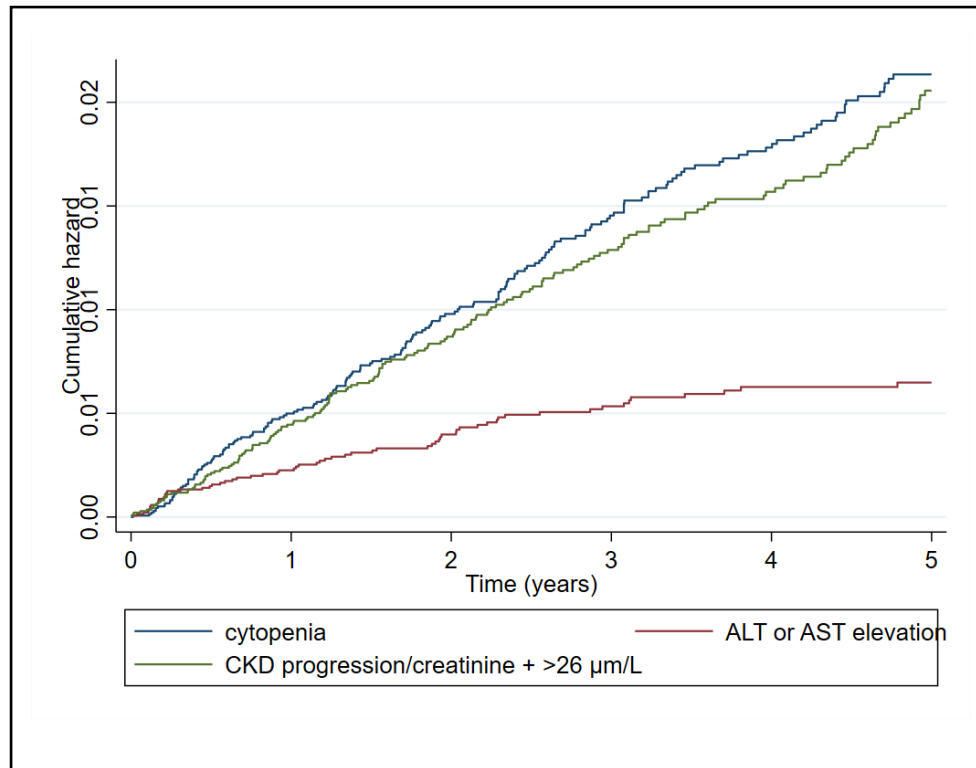

B.

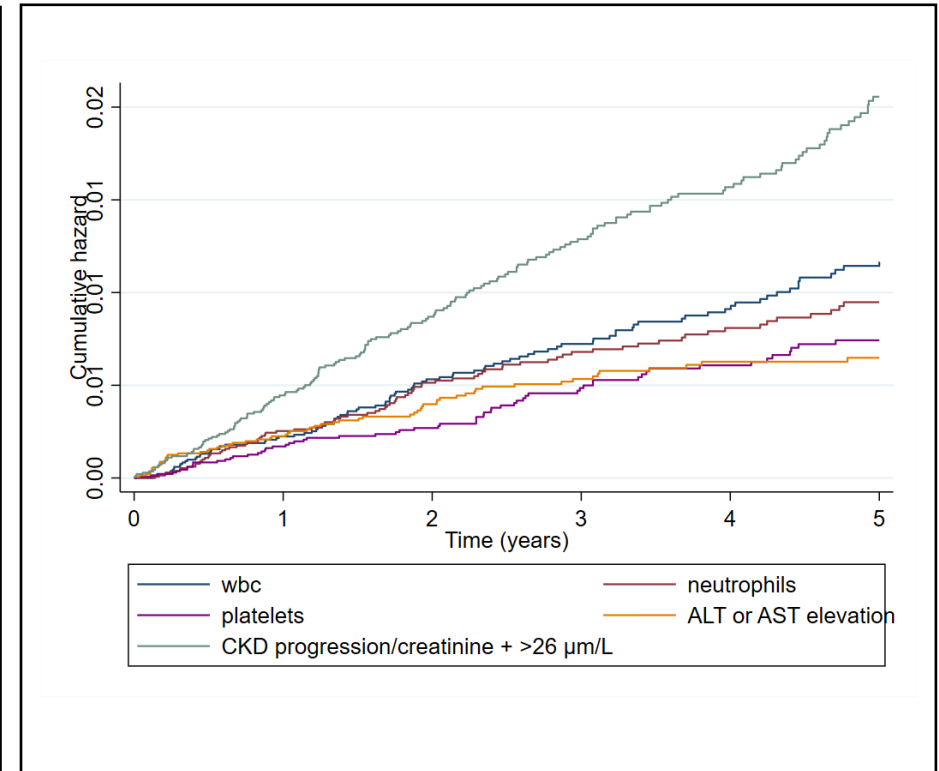

\* cytopenia defined as white blood cells (WBCs)  $<3.5 \times 10^9/l$  or neutrophils  $<1.6 \times 10^9/l$  or platelets  $<140 \times 10^9/l$ ; ALT/AST  $>100$  IU/l



Figure S4: Distribution of predicted risk in the model development cohort at 5 years

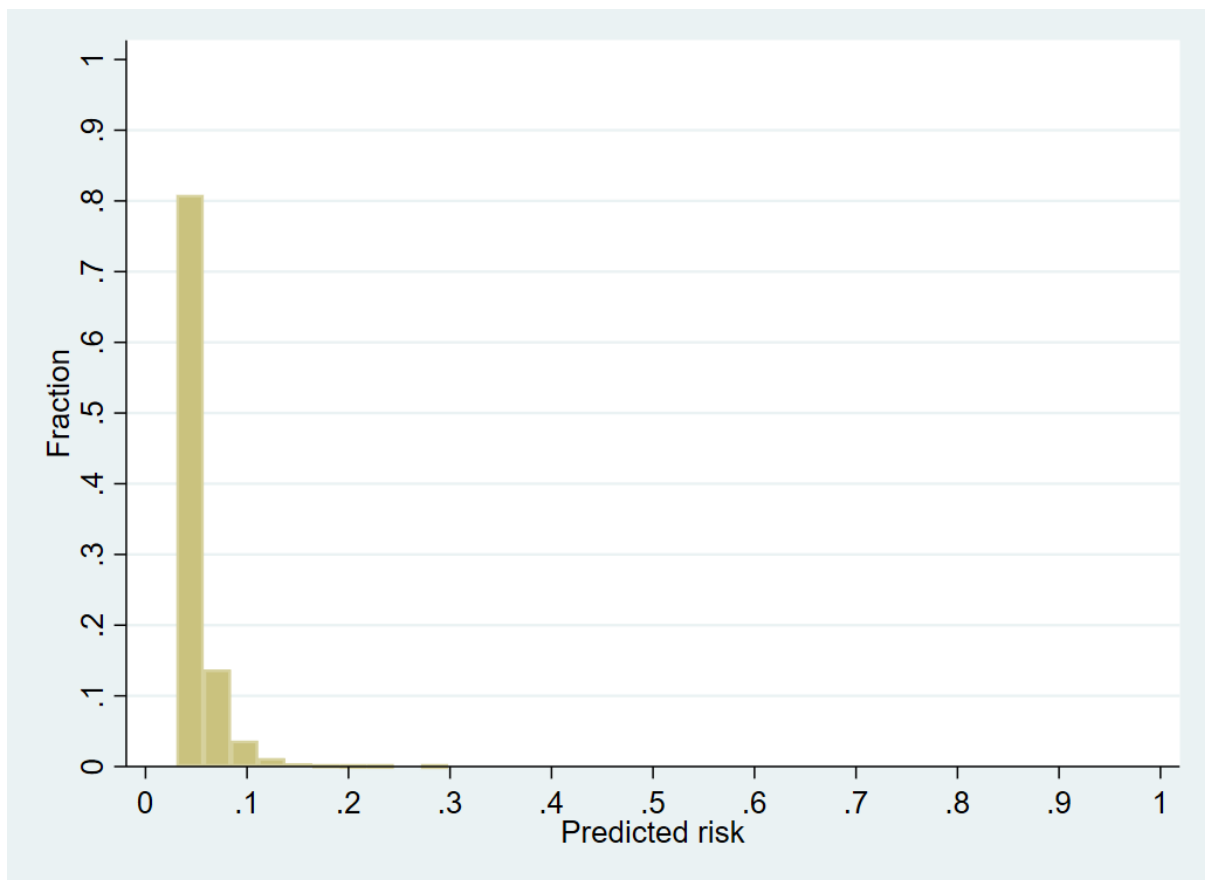

Figure S5: Calibration plot of a prognostic model for 5-ASA discontinuation with abnormal monitoring blood-test results at 5-years in the development cohort<sup>1</sup>

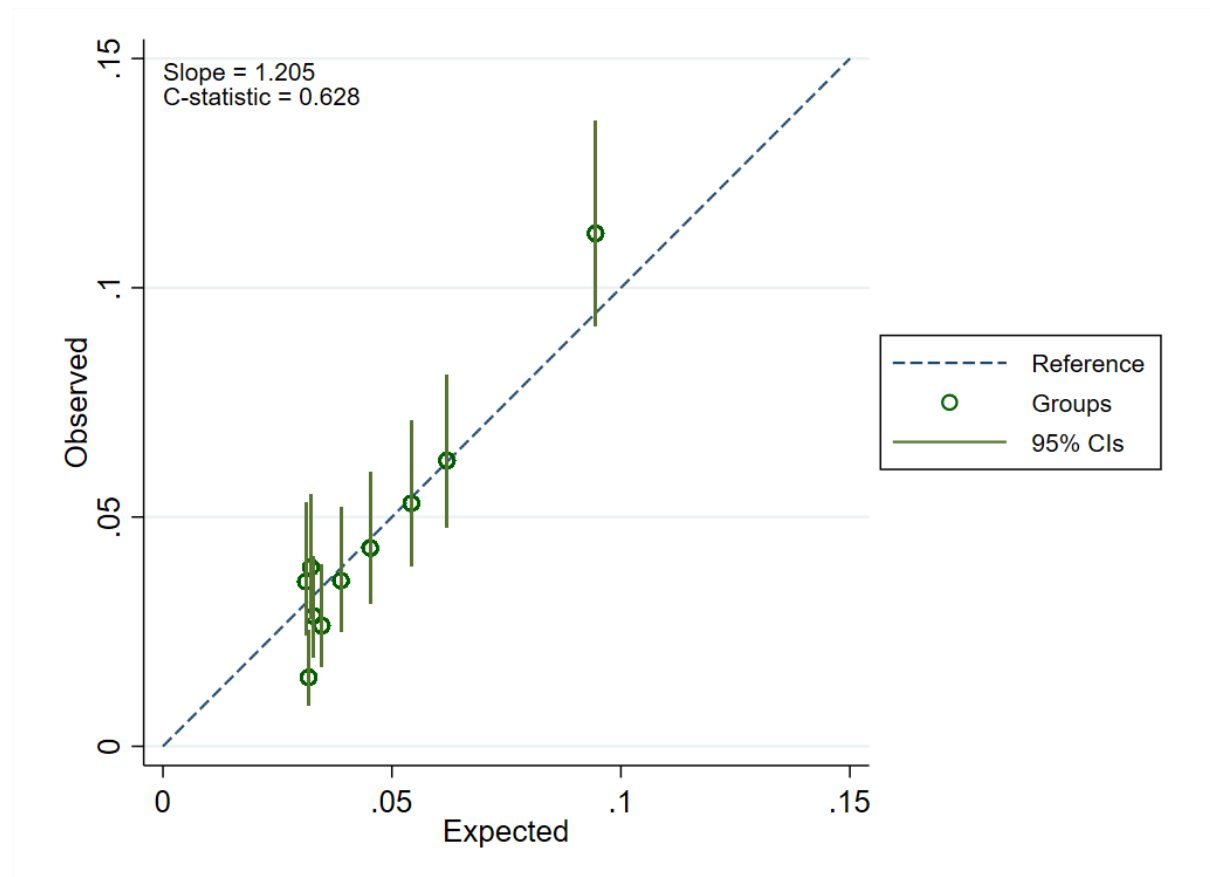

<sup>1</sup>Data from a single imputed dataset;  $So(t=5) = 0.971$

Figure S6: Calibration plot of a prognostic model for 5-ASA discontinuation with abnormal monitoring blood-test results at 5-years in the validation cohort<sup>1</sup>

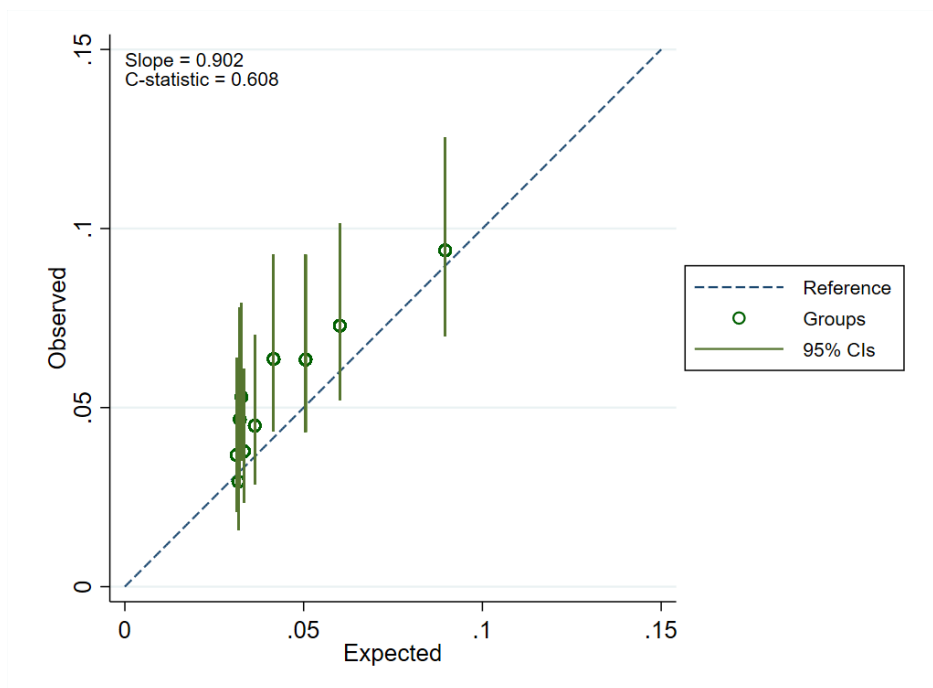

<sup>1</sup>Data from a single imputed dataset;  $So(t=5) = 0.971$

Figure S7: Distribution of predicted risk in the model validation cohort at 5 years

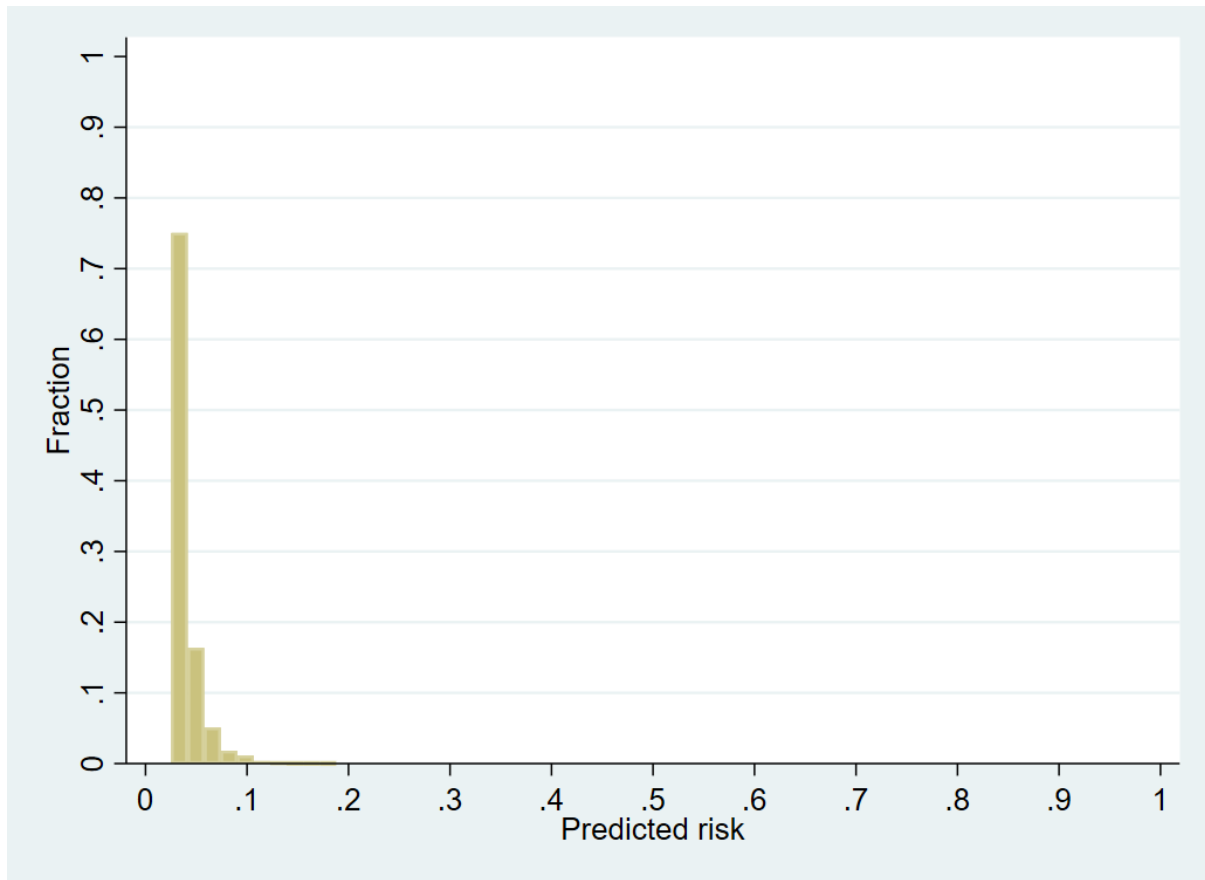

Figure S8: Calibration of a prognostic model for 5-ASA discontinuation with abnormal monitoring blood-test results at 1 year in the validation cohort<sup>1</sup>

A: Calibration plot

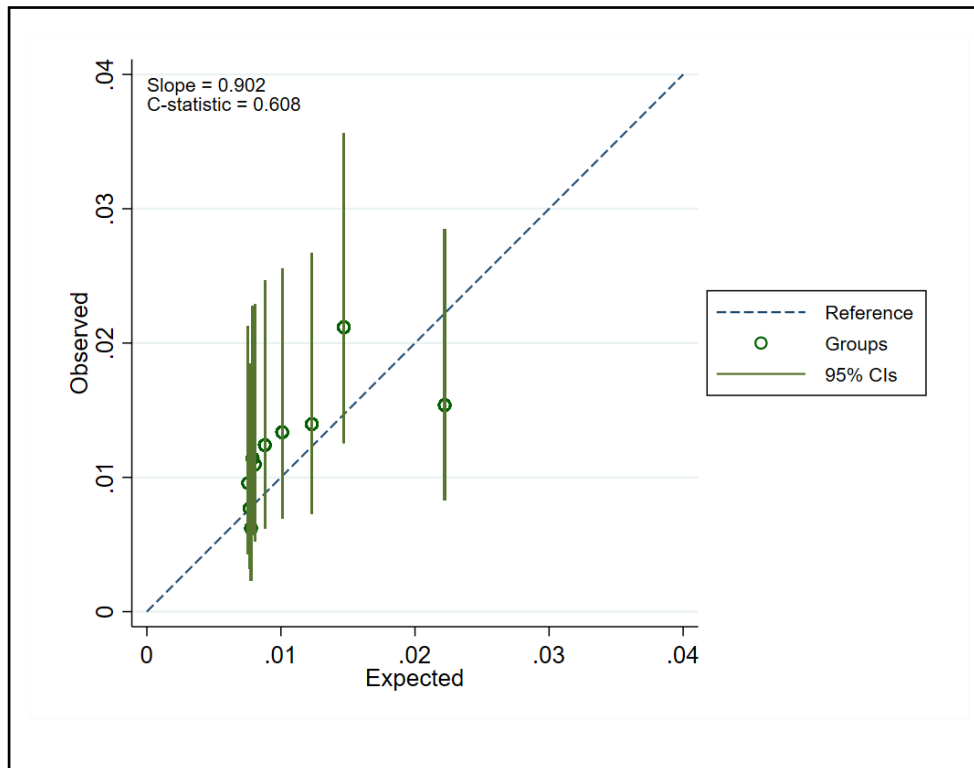

B: Smoothed calibration curve

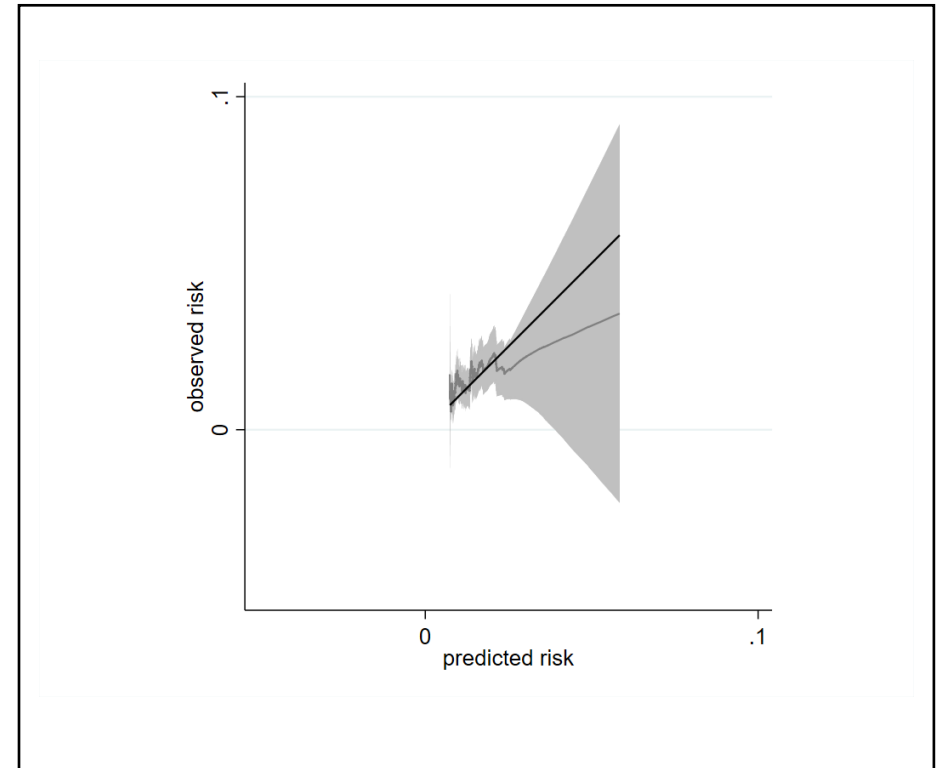

<sup>1</sup>Data from a single imputed dataset was used;  $S_o(t=1) = 0.993$

Figure S9: Calibration of a prognostic model for 5-ASA discontinuation with abnormal monitoring blood-test results at 2 years in the validation cohort<sup>1</sup>

A. Calibration plot

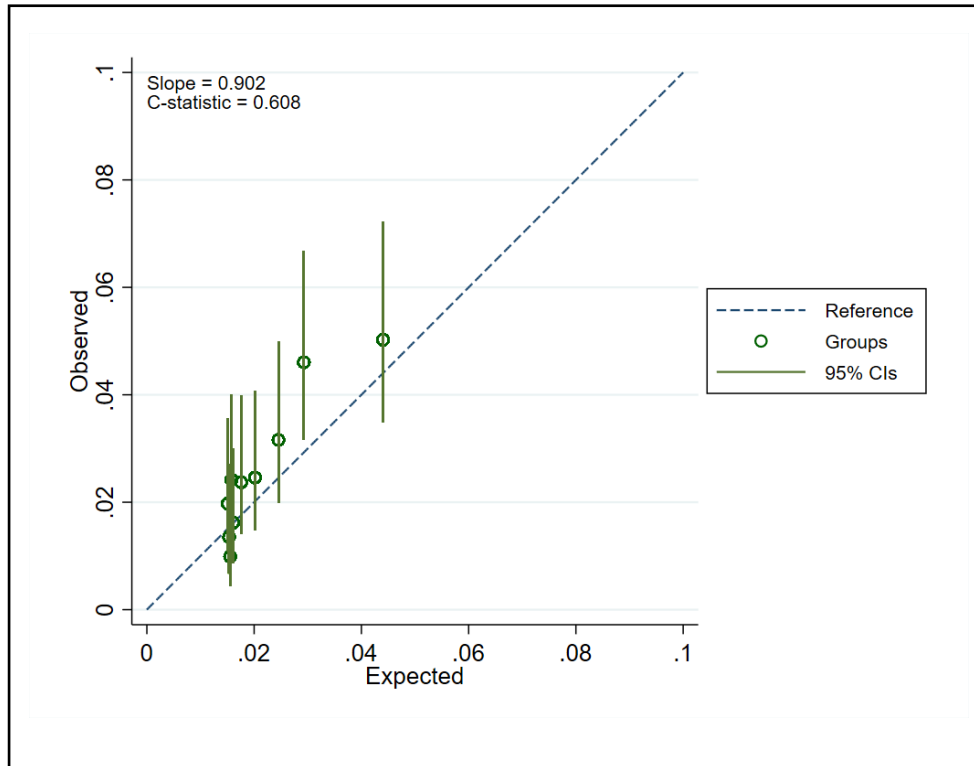

B. Smoothed calibration curve

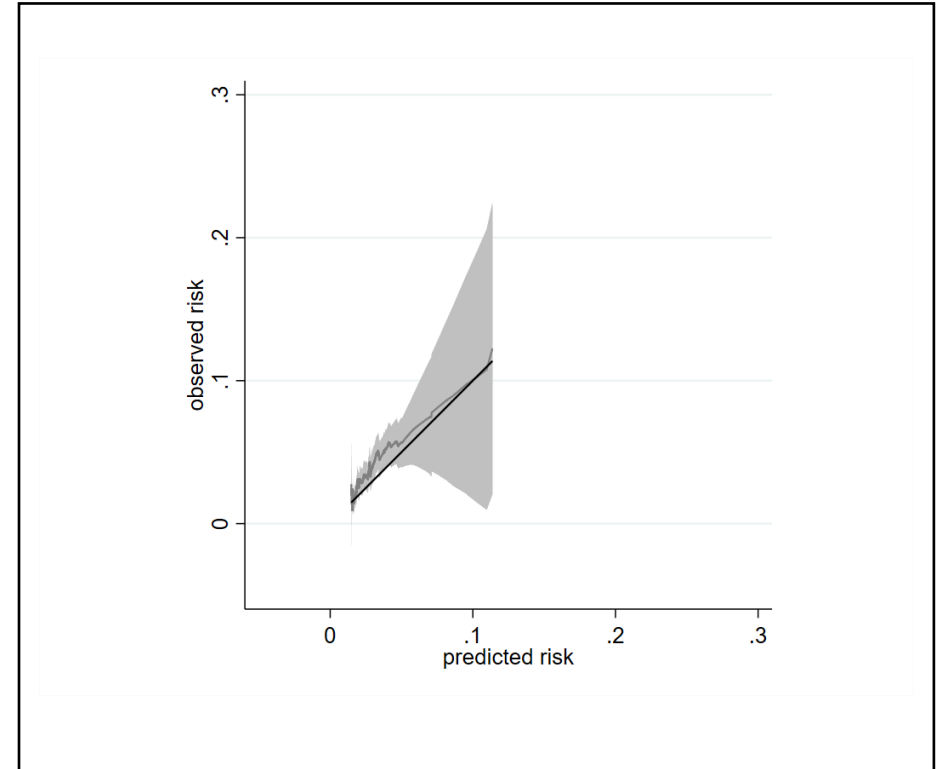

<sup>1</sup>Data from a single imputed dataset was used;  $S_o(t=2) = 0.986$

Figure S10: Calibration of a prognostic model for 5-ASA discontinuation with abnormal monitoring blood-test results at 3 years in the validation cohort<sup>1</sup>

A. Calibration plot

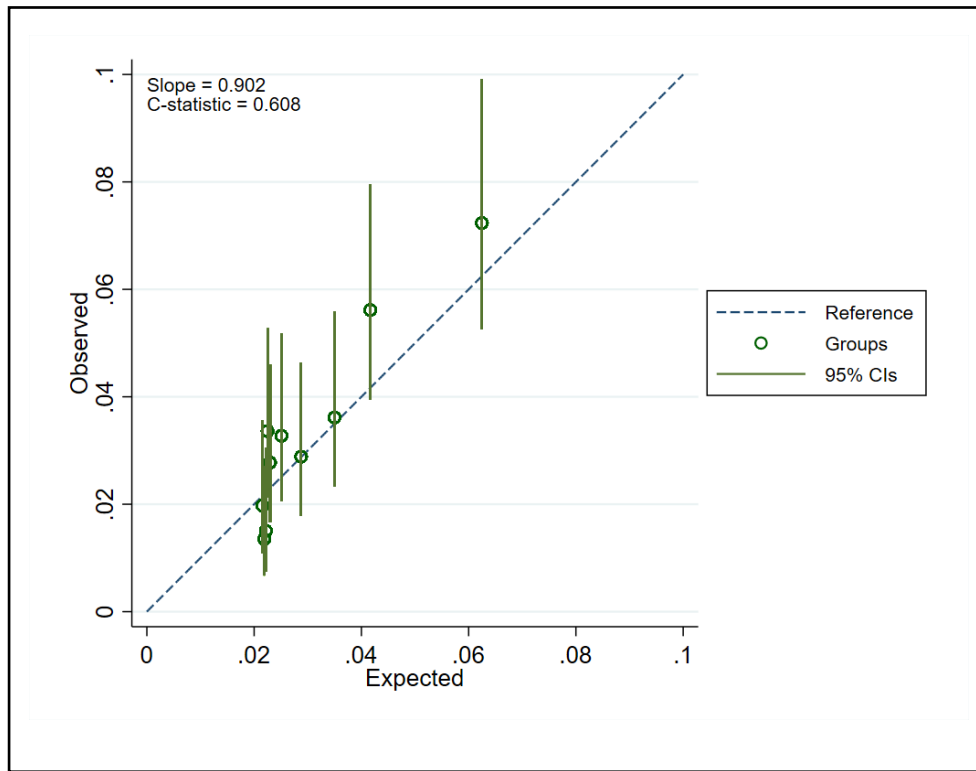

B. Smoothed calibration curve

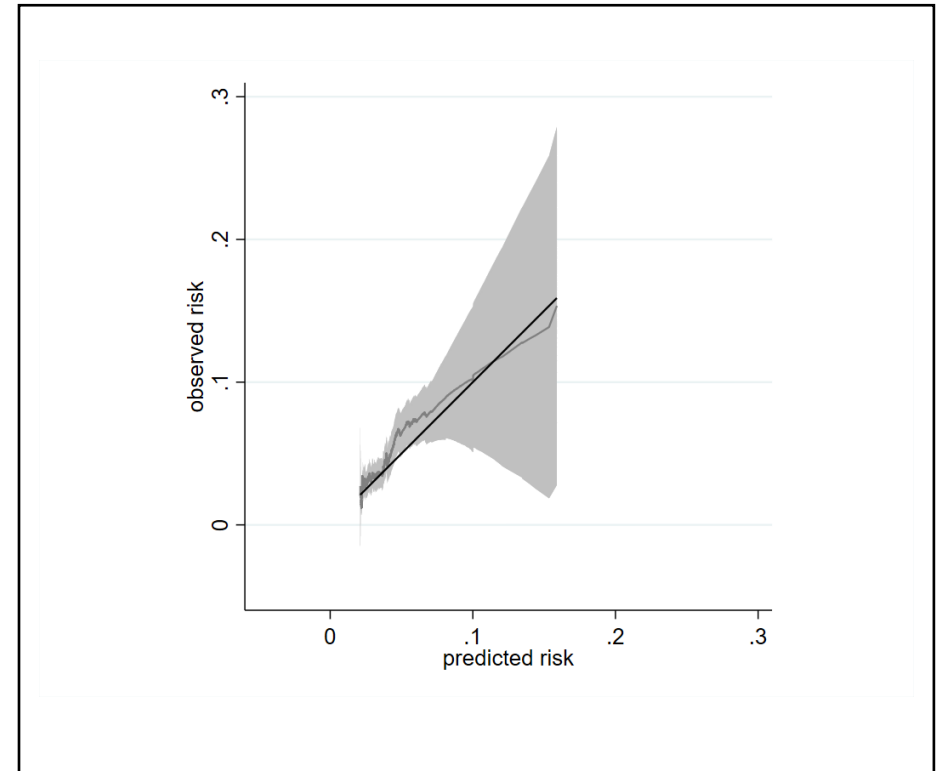

Data from a single imputed dataset was used;  $S_o(t_{=3}) = 0.980$

Figure S11: Calibration of a prognostic model for 5-ASA discontinuation with abnormal monitoring blood-test results at 4 years in the validation cohort<sup>1</sup>

A. Calibration plot

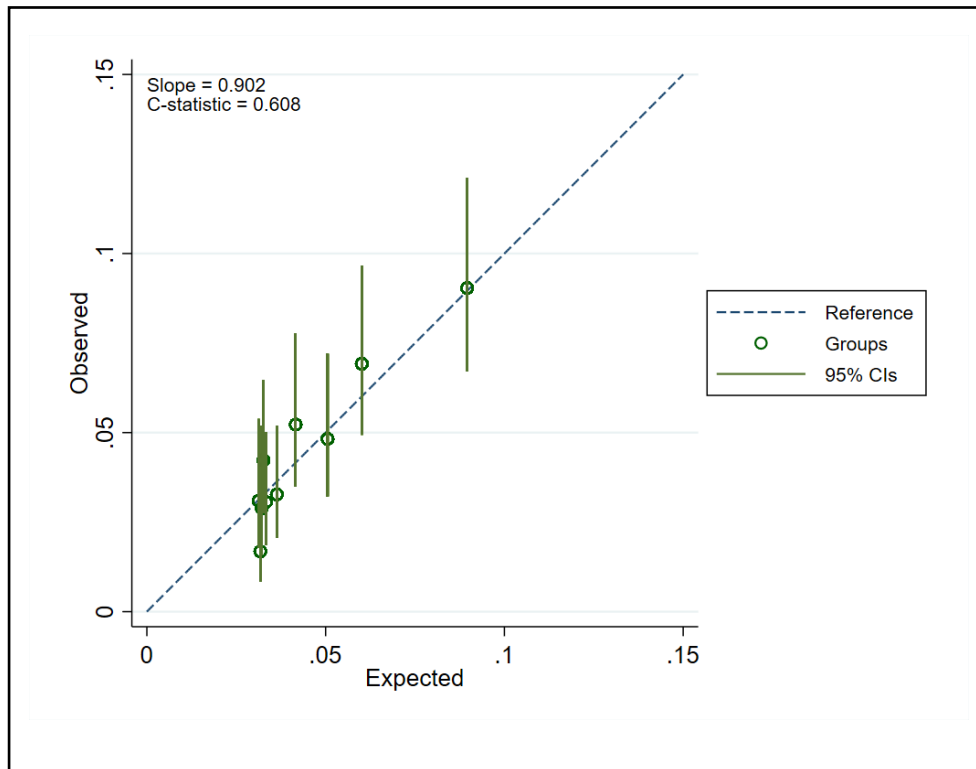

B. Smoothed calibration curve

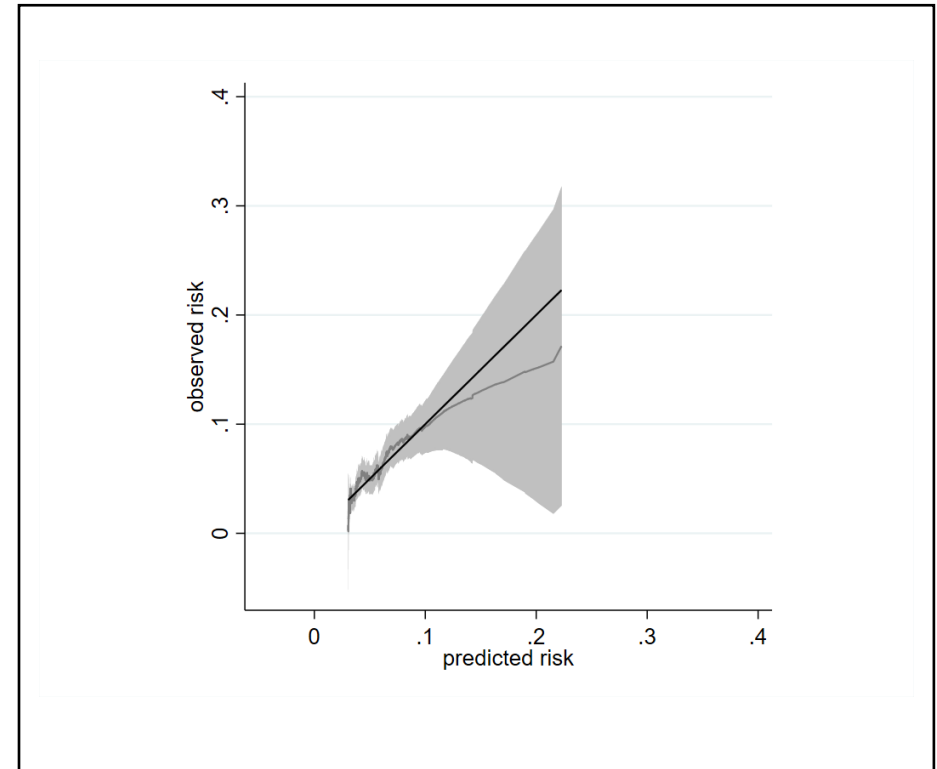

Data from a single imputed dataset was used;  $S_o(t_{=4})=0.976$



Figure S12: Incremental net monetary benefit results when the risks of serious conditions estimated by clinicians were tripled

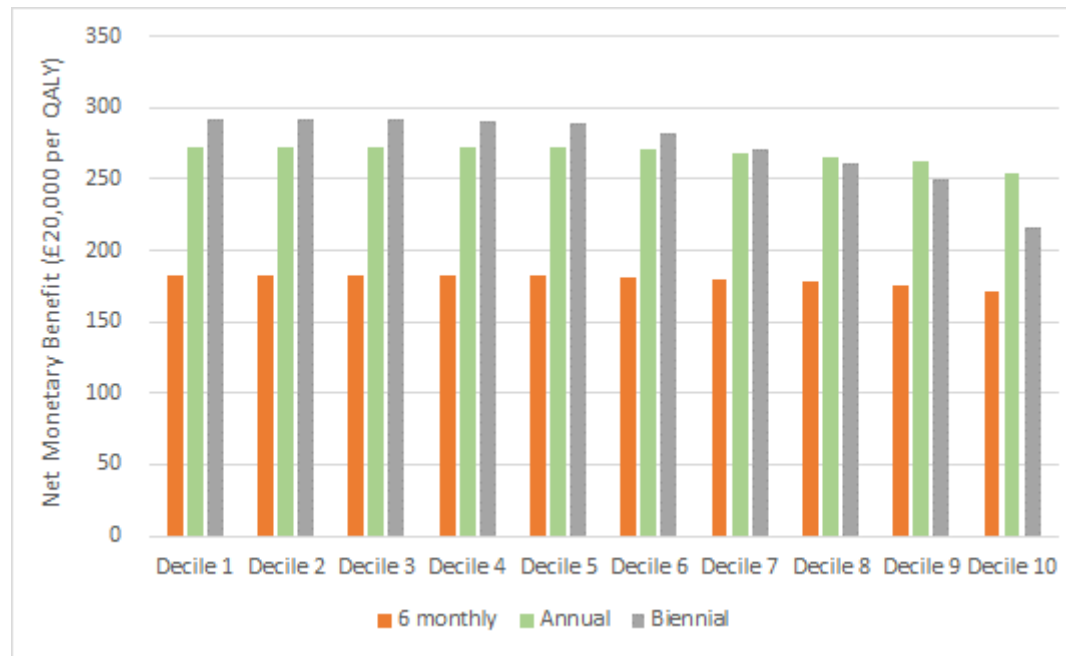

Supplement: Supplementary file [file media-1.pdf]
